# Supplementary material for: Arterial Stiffness and Cognition Among Adults: A Systematic Review and Meta‐Analysis of Observational and Longitudinal Studies
Source: PubMed Central journal article supplement — J Am Heart Assoc. 2020 Feb 28;9(5):e014621. doi: 10.1161/JAHA.119.014621 (PMC7335587; doi:10.1161/jaha.119.014621), 2020-02-28
Supplement: JAH3-9-e014621-s001.pdf [file JAH3-9-e014621-s001.pdf]

# **Supplemental Material**

## **Data S1.**

### **References excluded from the meta-analysis**

1. Arntzen KA, Schirmer H, Johnsen SH, Wilsgaard T, Mathiesen EB. Carotid atherosclerosis predicts lower cognitive test results: a 7-year follow-up study of 4,371 stroke-free subjects - the Tromsø study. *Cerebrovasc Dis.* 2012; 33:159-165.: report on IMT
2. Borrer A. Brain-derived neurotrophic factor mediates cognitive improvements following acute exercise. *Med Hypotheses.* 2017; 106: 1-5.: report on BDNF
3. Brant L, Bos D, Araujo LF, Ikram MA, Ribeiro AL, Barreto SM. Microvascular endothelial function and cognitive performance: The ELSA-Brasil cohort study. *Vasc Med.* 2018;23:212-218.: report on peripheral arterial tonometry and microvascular endothelial function.
4. Casado-Naranjo I, Romero Sevilla R, Portilla Cuenca JC, Duque de San Juan B, Calle Escobar ML, Fernández Pereira L, Fuentes JM, Ramírez-Moreno JM. Association between subclinical carotid atherosclerosis, hyperhomocysteinaemia and mild cognitive impairment. *Acta Neurol. Scand.* 2016;134;154-159.: report on subclinical markers of atherosclerosis.
5. Cohen RA, Poppas A, Forman DE, Hoth KF, Haley AP, Gunstad J, Jefferson AL, Tate DF, Paul RH, Sweet LH, Ono M, Jerskey BA, Gerhard-Herman M. Vascular and cognitive functions associated with cardiovascular disease in the elderly. *J. Clin. Exp. Neuropsychol.* 2009;31:96-110.: report on flow mediated brachial artery reactivity, and carotid intima media thickness.

6. Cooper LL, Himali J, Torjesen A, Tsao CW, Beiser A, Hamburg NM, DeCarli C, Vasani RS, Seshadri S, Pase MP, Mitchell G. Inter-Relations of Orthostatic Blood Pressure Change, Aortic Stiffness, and Brain Structure and Function in Young Adults. *J Am Heart Assoc.* 2017;17:e006206.: report on brain structure.
7. Dias Eda M1, Giollo LT Jr, Martinelli DD, Mazeti C, Júnior HM, Vilela-Martin JF, Yugar-Toledo JC. Carotid intima-media thickness is associated with cognitive deficiency in hypertensive patients with elevated central systolic blood pressure. *Cardiovasc Ultrasound.* 2012;10:41.: report on intima-media thickness.
8. Espeland MA, Beavers KM, Gibbs BB, Johnson KC, Hughes TM, Baker LD, Jakicic J, Korytkowski M, Miller M, Bray GA. Ankle-brachial index and inter-artery blood pressure differences as predictors of cognitive function in overweight and obese older adults with diabetes: results from the Action for Health in Diabetes movement and memory study. *Int J Geriatr Psychiatry.* 2015;30:999-1007.: report on ankle-brachial index
9. Espeland MA, Newman AB, Sink K, Gill TM, King AC, Miller ME, Guralnik J, Katula J, Church T, Manini T, Reid KF, McDermott MM; LIFE Study Group. Associations Between Ankle-Brachial Index and Cognitive Function: Results From the Lifestyle Interventions and Independence for Elders Trial. *J Am Med Assoc.* 2015;316:682-689.: report on ankle-brachial index
10. van Exel EL, Gussekloo J, Houx P, de Craen AJ, Macfarlane PW, Bootsma-van der Wiel A, Blauw GJ, Westendorp RG. Atherosclerosis and cognitive impairment are linked in the elderly. The Leiden 85-plus Study. *Atherosclerosis.* 2002;165:353-359.: report assessing the atherosclerotic burden.
11. Feinkohl I, Keller M, Robertson CM, Morling JR, Williamson RM, Nee LD, McLachlan S, Sattar N, Welsh P, Reynolds RM, Russ TC, Deary IJ, Strachan MW, Price

JF; Edinburgh Type 2 Diabetes Study (ET2DS) Investigators. Clinical and subclinical macrovascular disease as predictors of cognitive decline in older patients with type 2 diabetes: the Edinburgh Type 2 Diabetes Study. *Diabetes care*. 2013;36:2779-2786.: report on ankle-brachial index, and intima media thickness.

12. Fergenbaum JH<sup>1</sup>, Bruce S, Spence JD, Lou W, Hanley AJ, Greenwood C, Young TK. Carotid atherosclerosis and a reduced likelihood for lowered cognitive performance in a Canadian First Nations population. *Neuroepidemiology*. 2009;33:321-328.: report on carotid values.

13. Frazier DT, Seider T, Bettcher BM, Mack WJ, Jastrzab L, Chao L, Weiner MW, DeCarli C, Reed BR, Mungas D, Chui HC, Kramer JH. The role of carotid intima-media thickness in predicting longitudinal cognitive function in an older adult cohort. *Cerebrovasc Dis*. 2014;38:441-447.: report on intima media thickness

14. Forman DE, Cohen RA, Hoth KF, Haley AP, Poppas A, Moser DJ, Gunstad J, Paul RH, Jefferson AL, Tate DF, Ono M, Wake N, Gerhard-Herman M. Vascular Health and Cognitive Function in Older Adults with Cardiovascular Disease. *Artery Res*. 2008;2:35-43.: report on flow-mediated.

15. Gale CR<sup>1</sup>, Deary IJ, Fowkes FG, Batty GD. Intelligence in early adulthood and subclinical atherosclerosis in middle-aged men: the Vietnam Experience Study. *J Epidemiol Community Health*. 2012;66:e13.: report on ankle brachial index.

16. Gardener H, Caunca MR, Dong C, Cheung YK, Elkind MSV, Sacco RL, Rundek T, Wright CB. Ultrasound Markers of Carotid Atherosclerosis and Cognition: The Northern Manhattan Study. *Stroke*. 2017;48:1855-1861.: report on intima media thickness

17. Gatto NM, Henderson VW, St John JA, McCleary C, Detrano R, Hodis HN, Mack WJ Subclinical atherosclerosis is weakly associated with lower cognitive function in

healthy hyperhomocysteinemic adults without clinical cardiovascular disease. *Int J Geriatr Psychiatry*. 2009;24:390-399.: report on intima media thickness

18. Gutierrez J, Marshall RS, Lazar RM. Indirect measures of arterial stiffness and cognitive performance in individuals without traditional vascular risk factors or disease. *JAMA Neurol*. 2015;72:309-315.: report on increasing age, sedentary lifestyle, and the use of dihydropyridine calcium channel blockers

19. Huck DM, Hanna DB, Rubin LH, Maki P, Valcour V, Springer G, Xue X, Lazar J, Hodis HN, Anastos K, Kaplan RC, Kizer JR. Carotid Artery Stiffness and Cognitive Decline Among Women With or at Risk for HIV Infection. *J Acquir Immune Defic Syndr*. 2018;78:338-347.: report on carotid artery stiffness

20. Johnson NF, Gold BT, Brown CA, Angelis EF, Bailey AL, Clasey JL, Powell DK. Endothelial Function Is Associated with White Matter Microstructure and Executive Function in Older Adults. *Front Aging Neurosci*. 2017;9:255.: report on brain structure.

21. Kidher E, Harling L, Sugden C, Ashrafian H, Casula R, Evans P, Nihoyannopoulos P, Athanasioua T. Aortic stiffness is an indicator of cognitive dysfunction before and after aortic valve replacement for aortic stenosis. *Interact Cardiovasc Thorac Surg*. 2014;19:595-604.: less than 100 participants.

22. Kuller LH, Lopez OL, Gottdiener JS, Kitzman DW, Becker JT, Chang Y, Newman AB. Subclinical Atherosclerosis, Cardiac and Kidney Function, Heart Failure, and Dementia in the Very Elderly. *J Am Heart Assoc*. 2017;6.: report on predictors of arterial stiffness.

23. Masley SC, Masley LV, Gualtieri CT. Cardiovascular biomarkers and carotid IMT scores as predictors of cognitive function. *J Am Coll Nutr*. 2014;33:63-69.: report on intima media thickness.

24. Mehrabian S, Raycheva M, Gateva A, Todorova G, Angelova P, Traykova M, Angelova P, Traykova M, Stankova T, Kamenov Z, Traykova L. Cognitive dysfunction profile and arterial stiffness in type 2 diabetes. *J Neurol Sci.* 2012;322:152-156.: less than 100 participants.
25. Nieboer D, Douw L, van Dijk BW, Heymans MW, Stam CJ, Twisk JW. Relation between carotid stiffness, cognitive performance and brain connectivity in a healthy middle-aged population: an observational neurophysiological cohort study with magnetoencephalography. *BMJ Open.* 2016;6:e013441.: report on carotid stiffness.
26. Rogne SO1, Solbu MD, Arntzen KA, Herder M, Mathiesen EB, Schirmer H. Albuminuria and carotid atherosclerosis as predictors of cognitive function in a general population. *Eur Neurol.* 2013;70:340-348.: report on carotid intima-media thickness and carotid total plaque area.
27. Scuteri A, Brancati AM, Gianni W, Assisi A, Volpe M. Arterial stiffness is an independent risk factor for cognitive impairment in the elderly: a pilot study. *J Hypertens.* 2005;23:1211-1216.: less than 100 participants.
28. Suleman R, Padwal R, Hamilton P, Senthilselvan A, Alagiakrishnan K. Association between central blood pressure, arterial stiffness, and mild cognitive impairment. *Clin Hypertens.* 2017;23:2.: less than 100 participants.
29. Tarumi T, Gonzales MM, Fallow B, Nualnim N, Pyron M, Tanaka H, Andreana P. Central artery stiffness, neuropsychological function, and cerebral perfusion in sedentary and endurance-trained middle-aged adults. *J Hypertens.* 2013;31:2400-2409: less than 100 participants.
30. Viticchi G, Falsetti L, Vernieri F, Altamura C, Bartolini M, Luzzi S, Provinciali L, Silvestrini M. Vascular predictors of cognitive decline in patients with mild cognitive

impairment. *Neurobiol Aging*. 2012;33:1127.e1-9.: report on intima-media thickness and carotid plaque index

31. Wendell CR, Waldstein SR, Evans MK, Zonderman AB. Subclinical carotid atherosclerosis and neurocognitive function in an urban population. *Atherosclerosis*. 2016;249:125-131.: report on carotid measurements.

32. Xiang J, Zhang T, Yang QW, Liu J, Chen Y, Cui M, Yin ZG, Li L, Wang YJ, Li J, Zhou HD. Carotid artery atherosclerosis is correlated with cognitive impairment in an elderly urban Chinese non-stroke population. *J Clin Neurosci*. 2013;20:1571-1575: research on intima-media thickness.

**Table S1. Sensitivity analyses by removing studies one by one for unadjusted cross-sectional analysis.**

| <b>Global cognition</b>                   |           |           |           |                      |                   |          |
|-------------------------------------------|-----------|-----------|-----------|----------------------|-------------------|----------|
| <b>Author</b>                             | <b>es</b> | <b>ll</b> | <b>ul</b> | <b>I<sup>2</sup></b> | <b>Q-Cochrane</b> | <b>p</b> |
| Abbatecola et al., 2008 <sup>23</sup>     | -0.53     | -0.68     | -0.39     | 74.1                 | 30.86             | <0.001   |
| Angermann et al., 2017 <sup>25</sup>      | -0.44     | -0.53     | -0.35     | 26.4                 | 10.87             | 0.209    |
| Fukuhara et al., 2006 <sup>28</sup>       | -0.54     | -0.70     | -0.39     | 74.1                 | 30.88             | <0.001   |
| Hanon et al., 2005 <sup>30</sup>          | -0.53     | -0.68     | -0.38     | 73.5                 | 30.15             | <0.001   |
| Lee et al., 2014 <sup>35</sup>            | -0.49     | -0.62     | -0.36     | 66.4                 | 23.83             | 0.002    |
| Lim et al., 2016 <sup>13</sup>            | -0.55     | -0.70     | -0.40     | 73.9                 | 30.68             | <0.001   |
| Muela et al., 2018 <sup>37</sup>          | -0.55     | -0.70     | -0.40     | 73.9                 | 30.68             | <0.001   |
| Nilsson et al., 2014 <sup>39</sup>        | -0.56     | -0.72     | -0.40     | 70.3                 | 26.97             | 0.001    |
| Triantafyllidi et al., 2009 <sup>46</sup> | -0.54     | -0.69     | -0.39     | 74.1                 | 30.90             | <0.001   |
| Zhong et al., 2014 <sup>50</sup>          | -0.56     | -0.73     | -0.38     | 73.6                 | 30.32             | <0.001   |
| <b>Executive function</b>                 |           |           |           |                      |                   |          |
| <b>Author</b>                             | <b>es</b> | <b>ll</b> | <b>ul</b> | <b>I<sup>2</sup></b> |                   |          |
| Abbatecola et al., 2008 <sup>23</sup>     | -0.30     | -0.41     | -0.18     | 0.0                  | 1.77              | 0.413    |
| Kim et al., 2017 <sup>33</sup>            | -0.42     | -0.57     | -0.26     | 0.0                  | 2.00              | 0.368    |
| Muela et al., 2018 <sup>37</sup>          | -0.37     | -0.59     | -0.15     | 58.6                 | 4.83              | 0.089    |
| Zhong et al., 2014 <sup>50</sup>          | -0.36     | -0.59     | -0.12     | 53.5                 | 4.30              | 0.117    |
| <b>Memory</b>                             |           |           |           |                      |                   |          |
| <b>Author</b>                             | <b>es</b> | <b>ll</b> | <b>ul</b> | <b>I<sup>2</sup></b> |                   |          |
| Cooper et al., 2016 <sup>11</sup>         | -0.53     | -0.74     | -0.32     | 56.3                 | 2.29              | 0.130    |
| Muela et al., 2018 <sup>37</sup>          | -0.28     | -0.61     | 0.06      | 95.2                 | 20.82             | <0.001   |
| Zhong et al., 2014 <sup>50</sup>          | -0.38     | -0.94     | -0.18     | 93.3                 | 14.91             | <0.001   |



**Table S2. Sensitivity analyses by removing studies one by one for adjusted cross-sectional analysis.**

| <b>Global cognition</b>                 |           |           |           |                      |                   |          |
|-----------------------------------------|-----------|-----------|-----------|----------------------|-------------------|----------|
| <b>Author</b>                           | <b>es</b> | <b>ll</b> | <b>ul</b> | <b>I<sup>2</sup></b> | <b>Q-Cochrane</b> | <b>p</b> |
| Elias et al., 2009 <sup>27</sup>        | -0.22     | -0.32     | -0.12     | 77.6                 | 49.19             | <0.001   |
| Fukuhara et al., 2006 <sup>28</sup>     | -0.20     | -0.30     | -0.10     | 77.2                 | 48.26             | <0.001   |
| Hanon et al., 2005 <sup>30</sup>        | -0.21     | -0.31     | -0.11     | 77.9                 | 49.72             | <0.001   |
| Karasavvidou et al., 2018 <sup>31</sup> | -0.21     | -0.31     | -0.11     | 77.9                 | 49.78             | <0.001   |
| Kim et al., 2009 <sup>32</sup>          | -0.13     | -0.16     | -0.09     | 0.0                  | 9.10              | 0.613    |
| Lamballais et al., 2018 <sup>34</sup>   | -0.23     | -0.35     | -0.10     | 77.6                 | 49.16             | <0.001   |
| Lee et al., 2014 <sup>35</sup>          | -0.21     | -0.31     | -0.11     | 77.9                 | 49.67             | <0.001   |
| Lim et al., 2016 <sup>13</sup>          | -0.22     | -0.32     | -0.12     | 77.8                 | 49.63             | <0.001   |
| Muela et al., 2018 <sup>37</sup>        | -0.21     | -0.30     | -0.11     | 77.6                 | 49.19             | <0.001   |
| Palta et al., 2019 <sup>40</sup>        | -0.23     | -0.34     | -0.11     | 77.4                 | 48.59             | <0.001   |
| Ryu et al., 2017 <sup>43</sup>          | -0.19     | -0.29     | -0.10     | 76.2                 | 46.18             | <0.001   |
| Singer et al., 2013 <sup>45</sup>       | -0.22     | -0.32     | -0.12     | 77.5                 | 48.87             | <0.001   |
| Zhong et al., 2014 <sup>50</sup>        | -0.23     | -0.33     | -0.12     | 77.2                 | 48.21             | <0.001   |
| <b>Executive function</b>               |           |           |           |                      |                   |          |
| <b>Author</b>                           | <b>es</b> | <b>ll</b> | <b>ul</b> | <b>I<sup>2</sup></b> |                   |          |
| Geijselaers et al., 2016 <sup>29</sup>  | -0.10     | -0.15     | -0.04     | 52.5                 | 18.95             | 0.026    |
| Kim et al., 2017 <sup>32</sup>          | -0.09     | -0.14     | -0.03     | 61.0                 | 23.06             | 0.006    |
| Lim et al., 2016 <sup>13</sup>          | -0.07     | -0.12     | -0.02     | 49.5                 | 17.83             | 0.037    |
| Mitchell et al., 2011 <sup>36</sup>     | -0.08     | -0.13     | -0.02     | 58.3                 | 21.56             | 0.010    |
| Muller et al., 2006 <sup>38</sup>       | -0.08     | -0.14     | -0.02     | 60.9                 | 23.01             | 0.006    |
| Palta et al., 2019 <sup>40</sup>        | -0.09     | -0.16     | -0.02     | 56.6                 | 20.73             | 0.014    |
| Pase et al., 2016 <sup>41</sup>         | -0.08     | -0.14     | -0.02     | 59.7                 | 22.32             | 0.008    |
| Ryu et al., 2017 <sup>43</sup>          | -0.06     | -0.11     | -0.02     | 44.1                 | 16.10             | 0.065    |
| Singer et al., 2013 <sup>45</sup>       | -0.09     | -0.14     | -0.03     | 60.1                 | 22.58             | 0.007    |
| Tsao et al., 2013 <sup>47</sup>         | -0.07     | -0.13     | -0.02     | 55.6                 | 20.25             | 0.016    |
| Zhong et al., 2014 <sup>50</sup>        | -0.09     | -0.16     | -0.03     | 59.3                 | 22.11             | 0.009    |
| <b>Memory</b>                           |           |           |           |                      |                   |          |
| <b>Author</b>                           | <b>es</b> | <b>ll</b> | <b>ul</b> | <b>I<sup>2</sup></b> |                   |          |
| Cooper et al., 2016 <sup>11</sup>       | -0.13     | -0.21     | -0.05     | 81.7                 | 60.18             | <0.001   |
| Elias et al., 2009 <sup>27</sup>        | -0.14     | -0.22     | -0.06     | 81.9                 | 60.74             | <0.001   |
| Geijselaers et al., 2016 <sup>29</sup>  | -0.13     | -0.21     | -0.06     | 81.9                 | 60.88             | <0.001   |
| Lim et al., 2016 <sup>13</sup>          | -0.13     | -0.20     | -0.05     | 81.8                 | 60.54             | <0.001   |
| Mitchell et al., 2011 <sup>36</sup>     | -0.12     | -0.20     | -0.05     | 81.2                 | 58.48             | <0.001   |
| Muela et al., 2018 <sup>37</sup>        | -0.11     | -0.18     | -0.04     | 79.5                 | 53.70             | <0.001   |
| Muller et al., 2006 <sup>38</sup>       | -0.13     | -0.021    | -0.06     | 81.9                 | 60.89             | <0.001   |
| Palta et al., 2019 <sup>40</sup>        | -0.14     | -0.22     | 0.05      | 81.8                 | 60.40             | <0.001   |
| Pase et al., 2016 <sup>41</sup>         | -0.14     | -0.22     | -0.06     | 77.6                 | 49.20             | <0.001   |
| Ryu et al., 2017 <sup>43</sup>          | -0.07     | -0.12     | -0.03     | 50.1                 | 22.06             | 0.024    |
| Singer et al., 2013 <sup>45</sup>       | -0.13     | -0.20     | -0.05     | 81.8                 | 60.30             | <0.001   |
| Tsao et al., 2013 <sup>47</sup>         | -0.14     | -0.22     | -0.07     | 80.8                 | 57.33             | <0.001   |
| Zhong et al., 2014 <sup>50</sup>        | -0.13     | -0.21     | -0.06     | 81.9                 | 60.91             | <0.001   |

**Table S3. Sensitivity analyses by removing studies one by one for longitudinal analysis.**

| <b>Global cognition</b>                |           |           |           |                      |                   |          |
|----------------------------------------|-----------|-----------|-----------|----------------------|-------------------|----------|
| <b>Author</b>                          | <b>es</b> | <b>ll</b> | <b>ul</b> | <b>I<sup>2</sup></b> | <b>Q-Cochrane</b> | <b>p</b> |
| Al Hazzouri et al., 2013 <sup>24</sup> | -0.15     | -0.26     | -0.04     | 62.2                 | 10.59             | 0.032    |
| Benetos et al., 2012 <sup>26</sup>     | -0.22     | -0.41     | -0.03     | 89.9                 | 39.73             | <0.001   |
| Palta et al., 2019 <sup>40</sup>       | -0.22     | -0.40     | -0.04     | 89.9                 | 39.73             | <0.001   |
| Poels et al., 2007 <sup>42</sup>       | -0.26     | -0.37     | -0.16     | 54.8                 | 8.86              | 0.065    |
| Scuteri et al., 2007 <sup>44</sup>     | -0.20     | -0.36     | -0.04     | 89.7                 | 38.97             | <0.001   |
| Watson et al., 2011 <sup>49</sup>      | -0.21     | -0.39     | -0.03     | 89.9                 | 39.56             | <0.001   |
| <b>Executive function</b>              |           |           |           |                      |                   |          |
| <b>Author</b>                          | <b>es</b> | <b>ll</b> | <b>ul</b> | <b>I<sup>2</sup></b> |                   |          |
| Hajjar et al., 2016 <sup>12</sup>      | -0.11     | -0.25     | 0.02      | 64.0                 | 5.55              | 0.062    |
| Kim et al., 2017 <sup>33</sup>         | -0.12     | -0.23     | -0.01     | 67.0                 | 6.06              | 0.048    |
| Poels et al., 2007 <sup>42</sup>       | -0.18     | -0.27     | -0.09     | 0.0                  | 0.39              | 0.822    |
| Tsao et al., 2013 <sup>48</sup>        | -0.06     | -0.13     | 0.00      | 0.0                  | 1.67              | 0.434    |
| <b>Memory</b>                          |           |           |           |                      |                   |          |
| <b>Author</b>                          | <b>es</b> | <b>ll</b> | <b>ul</b> | <b>I<sup>2</sup></b> |                   |          |
| Hajjar et al., 2016 <sup>12</sup>      | -0.05     | -0.17     | 0.07      | 46.8                 | 1.88              | 0.170    |
| Kim et al., 2017 <sup>42</sup>         | -0.11     | -0.23     | 0.03      | 0.0                  | 0.18              | 0.675    |
| Poels et al., 2007 <sup>49</sup>       | -0.02     | -0.09     | 0.04      | 0.0                  | 0.79              | 0.375    |

**Table S4. Subgroup analyses for the association between PWv and cognition domains by type of sample, PWv measured and device used.**

|                                    | Longitudinal data |                      |                |            |        | Cross-sectional data |                      |                |            |        |          |                      |                |            |        |
|------------------------------------|-------------------|----------------------|----------------|------------|--------|----------------------|----------------------|----------------|------------|--------|----------|----------------------|----------------|------------|--------|
|                                    | n                 | ES (95%CI)           | I <sup>2</sup> | Q-Cochrane | p      | Unadjusted           |                      |                |            |        | Adjusted |                      |                |            |        |
|                                    |                   |                      |                |            |        | n                    | ES (95%CI)           | I <sup>2</sup> | Q-Cochrane | p      | n        | ES (95%CI)           | I <sup>2</sup> | Q-Cochrane | p      |
| <b>Global cognition</b>            |                   |                      |                |            |        |                      |                      |                |            |        |          |                      |                |            |        |
| Type of sample                     |                   |                      |                |            |        |                      |                      |                |            |        |          |                      |                |            |        |
| <i>General population</i>          | 5                 | -0.20 (-0.36, -0.04) | 89.7           | 38.97      | <0.001 | 4                    | -0.39 (-0.47, -0.32) | 0.0            | 0.70       | 0.872  | 8        | -0.19 (-0.31; -0.08) | 84.5           | 45.22      | <0.001 |
| <i>Specific disease population</i> | 1                 | -0.36 (-0.76, 0.04)  | NA             | NA         | NA     | 6                    | -0.67 (-0.92, -0.41) | 73.8           | 19.10      | 0.002  | 5        | -0.25 (-0.38, -0.11) | 0.0            | 2.42       | 0.659  |
| Type of PWv                        |                   |                      |                |            |        |                      |                      |                |            |        |          |                      |                |            |        |
| <i>cfPWv</i>                       | 5                 | -0.21 (-0.39, -0.03) | 89.9           | 39.56      | <0.001 | 9                    | -0.55 (-0.70, -0.39) | 74.1           | 30.88      | <0.001 | 10       | -0.12 (-0.16, -0.08) | 0.0            | 2.98       | 0.965  |
| <i>baPWv</i>                       | 0                 | NA                   | NA             | NA         | NA     | 1                    | -0.42 (-0.70, -0.14) | NA             | NA         | NA     | 3        | -0.56 (-0.88, -0.23) | 76.6           | 8.55       | 0.014  |
| <i>aPWv</i>                        | 1                 | -0.22 (-0.39, -0.05) | NA             | NA         | NA     | 0                    | NA                   | NA             | NA         | NA     | 0        | NA                   | NA             | NA         | NA     |
| Type of device                     |                   |                      |                |            |        |                      |                      |                |            |        |          |                      |                |            |        |
| <i>Sphygmocor</i>                  | 0                 | NA                   | NA             | NA         | NA     | 3                    | -0.52 (-0.81, -0.24) | 78.0           | 9.11       | 0.011  | 5        | -0.09 (-0.20, 0.02)  | 0.0            | 0.91       | 0.923  |
| <i>Complior</i>                    | 2                 | -0.13 (-0.45, 0.18)  | 63.6           | 2.75       | 0.097  | 4                    | -0.44 (-0.53, -0.35) | 0.0            | 1.33       | 0.723  | 4        | -0.13 (-0.17, -0.08) | 0.0            | 1.73       | 0.210  |
| <i>Other</i>                       | 4                 | -0.26 (-0.37, -0.14) | 65.7           | 8.74       | 0.033  | 3                    | -0.70 (-1.19, -0.22) | 83.8           | 12.37      | 0.002  | 4        | -0.43 (-0.81, -0.05) | 92.9           | 42.25      | <0.001 |
| <b>Executive function</b>          |                   |                      |                |            |        |                      |                      |                |            |        |          |                      |                |            |        |
| Type of sample                     |                   |                      |                |            |        |                      |                      |                |            |        |          |                      |                |            |        |
| <i>General population</i>          | 3                 | -0.12 (-0.23, -0.01) | 67.0           | 6.06       | 0.048  | 3                    | -0.36 (-0.59, -0.12) | 53.5           | 4.30       | <0.001 | 9        | -0.07 (-0.12, -0.01) | 50.3           | 16.10      | 0.041  |
| <i>Specific disease population</i> | 1                 | -0.09 (-0.80, 0.41)  | NA             | NA         | NA     | 1                    | -0.39 (-0.60, -0.19) | NA             | NA         | NA     | 2        | -0.16 (-0.38, 0.05)  | 70.7           | 3.41       | 0.065  |
| Type of PWv                        |                   |                      |                |            |        |                      |                      |                |            |        |          |                      |                |            |        |
| <i>cfPWv</i>                       | 4                 | -0.12 (-0.22, -0.02) | 83.1           | 6.06       | 0.001  | 4                    | -0.35 (-0.51, -0.20) | 38.4           | 4.87       | 0.182  | 10       | -0.06 (-0.11, -0.02) | 44.1           | 16.10      | 0.065  |
| <i>baPWv</i>                       | 0                 | NA                   | NA             | NA         | NA     | 0                    | NA                   | NA             | NA         | NA     | 1        | -0.27 (-0.43, -0.11) | NA             | NA         | NA     |
| <i>aPWv</i>                        | 0                 | NA                   | NA             | NA         | NA     | 0                    | NA                   | NA             | NA         | NA     | 0        | NA                   | NA             | NA         | NA     |
| Type of device                     |                   |                      |                |            |        |                      |                      |                |            |        |          |                      |                |            |        |
| <i>Sphygmocor</i>                  | 2                 | -0.15 (-0.29, 0.00)  | 0.0            | 0.04       | 0.836  | 1                    | -0.22 (-0.39, -0.05) | NA             | NA         | NA     | 5        | -0.05 (-0.19, 0.08)  | 56.1           | 9.12       | 0.058  |
| <i>Complior</i>                    | 1                 | -0.04 (-0.11, 0.04)  | NA             | NA         | NA     | 2                    | -0.38 (-0.54, -0.21) | 0.0            | 0.05       | 0.819  | 1        | -0.02 (-0.10, 0.06)  | NA             | NA         | NA     |
| <i>Other</i>                       | 1                 | -0.20 (-0.31, -0.09) | NA             | NA         | NA     | 1                    | -0.72 (-1.18, -0.27) | NA             | NA         | NA     | 5        | -0.12 (-0.19, -0.04) | 67.0           | 12.11      | 0.017  |
| <b>Memory</b>                      |                   |                      |                |            |        |                      |                      |                |            |        |          |                      |                |            |        |
| Type of sample                     |                   |                      |                |            |        |                      |                      |                |            |        |          |                      |                |            |        |
| <i>General population</i>          | 3                 | -0.05 (-0.12, 0.03)  | 13.8           | 2.32       | 0.314  | 2                    | -0.28 (-0.61, 0.06)  | 95.2           | 20.82      | <0.001 | 11       | -0.06 (-0.10, -0.02) | 30.4           | 14.38      | 0.156  |
| <i>Specific disease population</i> | 0                 | NA                   | NA             | NA         | NA     | 1                    | -0.68 (-0.96, -0.41) | NA             | NA         | NA     | 2        | -0.58 (-0.73, -0.43) | 0.0            | 0.10       | 0.753  |
| Type of PWv                        |                   |                      |                |            |        |                      |                      |                |            |        |          |                      |                |            |        |
| <i>cfPWv</i>                       | 2                 | -0.02 (-0.09, 0.04)  | 0.0            | 0.79       | 0.375  | 3                    | -0.39 (-0.70, -0.10) | 93.4           | 30.08      | <0.001 | 12       | -0.08 (-0.12, -0.03) | 50.1           | 22.06      | 0.024  |
| <i>baPWv</i>                       | 0                 | NA                   | NA             | NA         | NA     | 0                    | NA                   | NA             | NA         | NA     | 1        | -0.59 (-0.76, -0.43) | NA             | NA         | NA     |
| <i>aPWv</i>                        | 1                 | -0.14 (-0.31, 0.03)  | NA             | NA         | NA     | 0                    | NA                   | NA             | NA         | NA     | 0        | NA                   | NA             | NA         | NA     |
| Type of device                     |                   |                      |                |            |        |                      |                      |                |            |        |          |                      |                |            |        |
| <i>Sphygmocor</i>                  | 1                 | -0.09 (-0.25, 0.07)  | NA             | NA         | NA     | 0                    | NA                   | NA             | NA         | NA     | 5        | -0.07 (-0.15, 0.00)  | 0.0            | 1.18       | 0.881  |
| <i>Complior</i>                    | 1                 | -0.01 (-0.09, 0.07)  | NA             | NA         | NA     | 2                    | -0.53 (-0.74, -0.32) | 56.3           | 2.29       | 0.130  | 2        | -0.27 (-0.72, 0.04)  | 84.6           | 6.48       | 0.011  |
| <i>Other</i>                       | 1                 | -0.14 (-0.31, 0.03)  | NA             | NA         | NA     | 1                    | -0.11 (-0.20, -0.02) | NA             | NA         | NA     | 6        | -0.14 (-0.25, -0.03) | 90.5           | 52.52      | <0.001 |

PWv: Pulse Wave Velocity; cf: carotid-femoral; ba: brachial-ankle; a: aortic; NA: Not Available

**Table S5. Meta-regression of PWV and cognition domains by percentage of females and mean age, BMI, SBP and DBP of included studies.**

|                           | n  | % female<br>β (95%CI)  | p     | n  | Age<br>β (95%CI)       | p     | n  | BMI<br>β (95%CI)       | p     | n  | SBP<br>β (95%CI)        | p     | n | DBP<br>β (95%CI)       | p     |
|---------------------------|----|------------------------|-------|----|------------------------|-------|----|------------------------|-------|----|-------------------------|-------|---|------------------------|-------|
| <b>Global cognition</b>   |    |                        |       |    |                        |       |    |                        |       |    |                         |       |   |                        |       |
| Longitudinal data         | 4  | -0.00<br>(-0.03, 0.02) | 0.690 | 6  | -0.01<br>(-0.04, 0.03) | 0.643 | 6  | -0.04<br>(-0.31, 0.24) | 0.727 | 4  | -0.02<br>(-0.07, 0.03)  | 0.227 | 3 | -0.02<br>(-0.04, 0.01) | 0.142 |
| Cross-sectional data      |    |                        |       |    |                        |       |    |                        |       |    |                         |       |   |                        |       |
| <i>Unadjusted</i>         | 9  | 0.00<br>(-0.01, 0.02)  | 0.497 | 10 | 0.00<br>(-0.02, 0.02)  | 0.649 | 8  | 0.02<br>(-0.02, 0.05)  | 0.338 | 8  | 0.02<br>(-0.00, 0.05)   | 0.062 | 8 | 0.03<br>(-0.03, 0.09)  | 0.256 |
| <i>Adjusted</i>           | 13 | -0.00<br>(-0.01, 0.01) | 0.991 | 13 | 0.01<br>(-0.01, 0.02)  | 0.348 | 12 | 0.04<br>(-0.02, 0.11)  | 0.173 | 10 | 0.01<br>(-0.02, 0.04)   | 0.554 | 8 | -0.01<br>(-0.13, 0.11) | 0.878 |
| <b>Executive function</b> |    |                        |       |    |                        |       |    |                        |       |    |                         |       |   |                        |       |
| Longitudinal data         | 4  | -0.00<br>(-0.05, 0.05) | 0.910 | 4  | 0.01<br>(-0.02, 0.03)  | 0.449 | 3  | -0.05<br>(-0.79, 0.68) | 0.512 | 3  | -0.01<br>(-0.27, 0.25)  | 0.824 | 2 | NA                     | NA    |
| Cross-sectional data      |    |                        |       |    |                        |       |    |                        |       |    |                         |       |   |                        |       |
| <i>Unadjusted</i>         | 3  | -0.00<br>(-0.05, 0.05) | 0.993 | 4  | -0.01<br>(-0.03, 0.02) | 0.286 | 3  | 0.06<br>(-1.19, 1.31)  | 0.640 | 2  | NA                      | NA    | 2 | NA                     | NA    |
| <i>Adjusted</i>           | 11 | -0.00<br>(-0.01, 0.00) | 0.548 | 11 | 0.00<br>(-0.01, 0.01)  | 0.839 | 7  | 0.03<br>(-0.01, 0.08)  | 0.127 | 7  | 0.00<br>(-0.01, 0.01)   | 0.837 | 4 | 0.00<br>(-0.05, 0.06)  | 0.757 |
| <b>Memory</b>             |    |                        |       |    |                        |       |    |                        |       |    |                         |       |   |                        |       |
| Longitudinal data         | 3  | 0.00<br>(-0.12, 0.12)  | 0.949 | 3  | 0.00<br>(-0.06, 0.07)  | 0.833 | 3  | -0.05<br>(-1.28, 1.18) | 0.684 | 1  | NA                      | NA    | 1 | NA                     | NA    |
| Cross-sectional data      |    |                        |       |    |                        |       |    |                        |       |    |                         |       |   |                        |       |
| <i>Unadjusted</i>         | 3  | 0.01<br>(-0.06, 0.07)  | 0.404 | 3  | 0.02<br>(-0.11, 0.15)  | 0.492 | 3  | -0.09<br>(-1.53, 1.35) | 0.587 | 2  | NA                      | NA    | 2 | NA                     | NA    |
| <i>Adjusted</i>           | 13 | 0.00<br>(-0.01, 0.01)  | 0.853 | 13 | -0.00<br>(-0.01, 0.01) | 0.584 | 10 | 0.01<br>(-0.02, 0.05)  | 0.343 | 10 | -0.00<br>(-0.01, -0.00) | 0.027 | 7 | -0.01<br>(-0.03, 0.02) | 0.653 |

NA: Not Available

**Table S6. Risk of bias of cross-sectional and longitudinal included studies.**

| References                                  | 1 | 2 | 3  | 4  | 5  | 6  | 7 | 8 | 9 | 10 | 11 | 12 | 13 | 14 | Total |
|---------------------------------------------|---|---|----|----|----|----|---|---|---|----|----|----|----|----|-------|
| Abbatecola et al., 2008 <sup>23</sup>       | Y | Y | NR | Y  | NR | NR | Y | N | Y | Y  | Y  | NR | Y  | Y  | 9     |
| Al Hazzouri et al., 2013 <sup>24</sup>      | Y | Y | Y  | Y  | NR | Y  | Y | Y | Y | Y  | Y  | Y  | Y  | Y  | 12    |
| Angermann et al., 2017 <sup>25</sup>        | Y | Y | NR | Y  | NR | Y  | - | Y | Y | -  | Y  | NR | -  | N  | 7     |
| Benetos et al., 2012 <sup>26</sup>          | Y | Y | NR | Y  | NR | Y  | Y | Y | Y | N  | Y  | NR | N  | Y  | 9     |
| Cooper et al., 2016 <sup>11</sup>           | Y | Y | Y  | Y  | NR | NR | - | N | Y | -  | Y  | NR | -  | Y  | 7     |
| Elias et al., 2009 <sup>27</sup>            | Y | Y | Y  | Y  | NR | Y  | - | Y | Y | -  | Y  | NR | -  | Y  | 9     |
| Fujiwara et al., 2005 <sup>51</sup>         | Y | Y | N  | Y  | NR | NR | - | Y | Y | -  | Y  | NR | -  | Y  | 7     |
| Fukuhara et al., 2006 <sup>28</sup>         | Y | Y | Y  | Y  | NR | NR | - | N | Y | -  | Y  | NR | -  | Y  | 7     |
| Geijselaers et al., 2016 <sup>29</sup>      | Y | Y | Y  | Y  | NR | NR | - | Y | Y | -  | Y  | NR | -  | Y  | 8     |
| Hajjar et al., 2016 <sup>12</sup>           | Y | Y | NR | Y  | NR | NR | Y | Y | Y | Y  | Y  | NR | Y  | Y  | 10    |
| Hanon et al., 2005 <sup>30</sup>            | Y | Y | NR | Y  | NR | NR | - | Y | Y | -  | Y  | Y  | -  | Y  | 8     |
| Karasavidou et al., 2018 <sup>31</sup>      | Y | Y | Y  | Y  | NR | NR | - | Y | Y | -  | Y  | NR | -  | Y  | 8     |
| Kearney-Schwartz et al., 2009 <sup>52</sup> | Y | Y | Y  | Y  | Y  | NR | - | Y | Y | -  | Y  | Y  | -  | Y  | 10    |
| Kim et al., 2009 <sup>32</sup>              | Y | Y | N  | Y  | NR | NR | - | N | Y | -  | N  | NR | -  | N  | 4     |
| Kim et al., 2017 <sup>33</sup>              | Y | Y | Y  | Y  | NR | NR | Y | Y | Y | Y  | Y  | NR | Y  | Y  | 11    |
| Lamballais et al., 2018 <sup>34</sup>       | Y | Y | Y  | Y  | NR | NR | - | N | Y | -  | Y  | NR | -  | Y  | 7     |
| Lee et al., 2014 <sup>35</sup>              | Y | Y | Y  | Y  | NR | NR | - | N | Y | -  | Y  | NR | -  | Y  | 7     |
| Lim et al., 2016 <sup>13</sup>              | Y | Y | NR | Y  | NR | NR | - | N | Y | -  | Y  | NR | -  | Y  | 6     |
| Meyer et al., 2017 <sup>53</sup>            | Y | Y | N  | Y  | N  | NR | - | Y | Y | -  | Y  | NR | -  | Y  | 7     |
| Mitchell et al., 2011 <sup>36</sup>         | Y | Y | N  | Y  | NR | NR | - | Y | Y | -  | Y  | NR | -  | Y  | 7     |
| Muela et al., 2018 <sup>37</sup>            | Y | Y | NR | Y  | NR | NR | - | Y | Y | -  | Y  | Y  | -  | Y  | 8     |
| Muller et al., 2006 <sup>38</sup>           | Y | Y | N  | Y  | NR | NR | - | Y | Y | -  | Y  | NR | -  | Y  | 7     |
| Nilson et al., 2014 <sup>39</sup>           | Y | Y | N  | Y  | NR | NR | - | Y | Y | -  | Y  | NR | -  | Y  | 7     |
| Nilson et al., 2017 <sup>54</sup>           | Y | Y | N  | Y  | NR | NR | - | Y | Y | -  | Y  | NR | -  | Y  | 7     |
| Palta et al., 2019 <sup>40</sup>            | Y | Y | Y  | Y  | NR | Y  | Y | Y | Y | N  | Y  | NR | N  | Y  | 10    |
| Pase et al., 2016 <sup>41</sup>             | Y | Y | Y  | Y  | NR | NR | - | Y | Y | -  | Y  | Y  | -  | Y  | 9     |
| Poels et al., 2007 <sup>42</sup>            | Y | Y | N  | Y  | NR | NR | Y | N | Y | Y  | Y  | Y  | N  | Y  | 9     |
| Ryu et al., 2017 <sup>43</sup>              | Y | Y | NR | Y  | NR | NR | - | N | Y | -  | Y  | N  | -  | N  | 5     |
| Scuteri et al., 2007 <sup>44</sup>          | Y | Y | Y  | Y  | NR | NR | - | N | Y | -  | Y  | Y  | -  | Y  | 8     |
| Singer et al., 2013 <sup>45</sup>           | Y | Y | N  | Y  | NR | NR | - | Y | Y | -  | Y  | NR | -  | Y  | 7     |
| Sugawara et al., 2010 <sup>55</sup>         | Y | Y | Y  | Y  | NR | NR | - | Y | Y | -  | Y  | NR | -  | Y  | 8     |
| Taniguchi et al., 2014 <sup>56</sup>        | Y | Y | Y  | Y  | NR | NR | - | Y | Y | -  | Y  | Y  | -  | Y  | 9     |
| Triantafyllidi et al., 2009 <sup>46</sup>   | Y | Y | Y  | Y  | NR | NR | - | Y | Y | -  | Y  | Y  | -  | Y  | 9     |
| Tsao et al., 2013 <sup>47</sup>             | Y | Y | Y  | Y  | NR | NR | - | N | Y | -  | Y  | Y  | -  | Y  | 8     |
| Tsao et al., 2016 <sup>48</sup>             | Y | Y | Y  | Y  | NR | Y  | Y | Y | Y | N  | Y  | Y  | Y  | Y  | 12    |
| Tuttolomondo et al., 2017 <sup>57</sup>     | Y | Y | NR | Y  | NR | NR | - | Y | Y | -  | Y  | NR | -  | Y  | 7     |
| Watson et al., 2011 <sup>49</sup>           | Y | Y | NR | Y  | NR | Y  | Y | Y | Y | N  | Y  | NR | Y  | Y  | 10    |
| Zhong et al., 2014 <sup>50</sup>            | Y | Y | NR | NR | NR | NR | - | Y | Y | -  | Y  | NR | -  | Y  | 6     |

Y: Yes; N: No; NR: Not Reported
